# Supplementary material for: Combustion synthesis of (U,Pu)O 2 solid solution: from parametric study to sintered pellet
Source: Royal Society of Chemistry journal article supplement (doi:10.1039/d5dt02138c), 2026-01-01
Supplement: d5dt02138c1.pdf [file d5dt02138c1.pdf]

## Combustion synthesis of (U,Pu)O<sub>2</sub> solid solution: from parametric study to sintered pellet

Anna Hauteau<sup>1,2</sup>, Paul Estevenon<sup>2</sup>, Elena Bazarkina<sup>3,4</sup>, Philippe Martin<sup>2</sup>, Florent Lebreton<sup>2</sup>, Cyrielle Rey<sup>1</sup>, Kristina Kvashnina<sup>3,4</sup>, Xavier Deschanel<sup>2</sup>

<sup>1</sup> ICSM, Univ Montpellier, CNRS, CEA, ENSCM, Bagnols-sur-Cèze, France

<sup>2</sup> CEA, DES, ISEC, DMRC, Univ Montpellier, Marcoule, France

<sup>3</sup> The Rossendorf Beamline at ESRF, CS 40220, 38043, Grenoble Cedex 9, France

<sup>4</sup> Helmholtz Zentrum Dresden Rossendorf (HZDR), Institute of Resource Ecology, 01314 Dresden, Germany

### Supplementary information

**Stoichiometric conditions according to Jain [36]:**

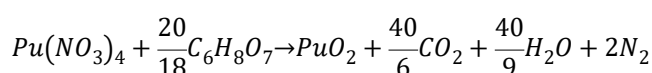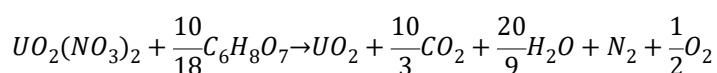

**Theoretical calculation of stoichiometric conditions for a two oxidant-system:**

When mixing two metals ( $M_1$  and  $M_2$ ) with different oxidant valences, several definitions enter in conflict. Monnier [32] and Peter Soldani [41] proposed to calculate the optimal richness, considering the optimal richness of each mixture (Fuel/Metal 1 and Fuel/Metal 2):

$$\phi = \phi_{M_1} \frac{M_1}{M_1 + M_2} + \phi_{M_2} \frac{M_2}{M_1 + M_2}$$

Deganello and Tyagi proposed to consider a valence for the mixture according to the valences of the two metals and the  $M_1/M_2$  ratio [53]:

$$V_{M_1 + M_2} = V_1 \frac{M_1}{M_1 + M_2} + V_2 \frac{M_2}{M_1 + M_2}$$

### References for HERFD-XANES deconvolution

The HERFD-XANES spectra were deconvoluted with a reference dataset, on Microsoft Excel solver. A linear combination of references was used to generate a model. Each reference corresponds to a specific oxidation state of actinide.

- **Pu M<sub>4</sub> edge :**
  - Pu(III): Pu<sup>III</sup>PO<sub>4</sub>

$\text{PuPO}_4$  was obtained by hydrothermal treatment of Pu(III) aqueous solution in hydrochloric media with  $\text{H}_3\text{PO}_4$  (24 hours at  $140^\circ\text{C}$ ). The powder obtained was then calcinated 1 hour at  $1100^\circ\text{C}$  under reductive atmosphere (Ar 95.7% ;  $\text{H}_2$  4,3%) to obtain monazite type  $\text{PuPO}_4$ . The sample was characterized by PXRD measurement to confirm the formation of monazite type  $\text{PuPO}_4$ .

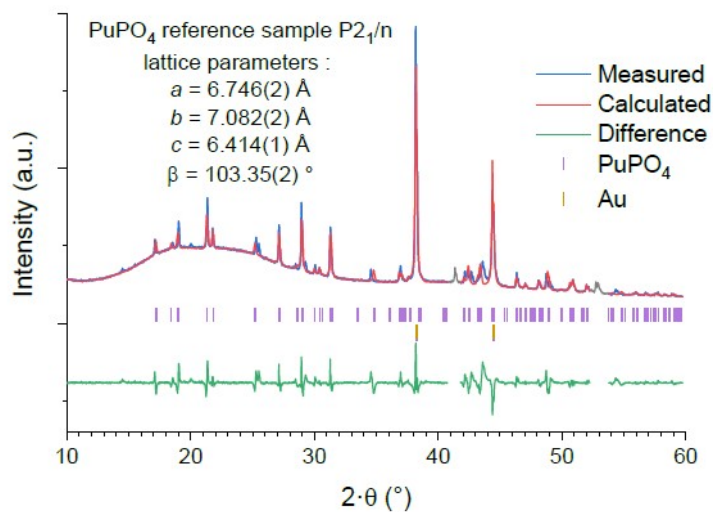

Figure S 1: PXRD-pattern of  $\text{PuPO}_4$  powder used for Pu(+III) reference

- Pu(IV):  $\text{Pu}^{\text{IV}}\text{O}_2^*$

$\text{PuO}_2$  was obtained by oxalic precipitation of Pu(+IV), the sample was then calcinated 1 hour at  $1100^\circ\text{C}$  under air atmosphere. The stoichiometry of the oxide ( $\text{O}/\text{M} = 2.00$ ) was checked by PXRD measurement (Figure S 2).

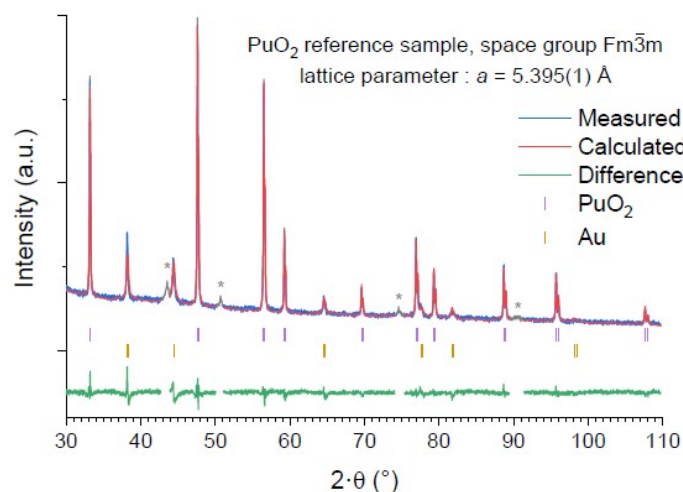

Figure S 2 : PXRD-pattern of  $\text{PuO}_2$  powder used for spectrometer alignment and Pu(+IV) reference

- Pu(V):  $\text{Na}_3(\text{Pu}^{\text{VO}_2})(\text{CO}_3)_2$

$\text{Na}_3(\text{Pu}^{\text{VO}_2})(\text{CO}_3)_2$  was obtained according to the protocol reported by Madic *et al.* [61] by electroreduction of a Pu(+VI) stock solution in sodium carbonate media. The structure was checked by Raman spectroscopy (Figure S 3). Additionally the HERFD-XANES spectra was compared to the  $\text{K}(\text{Pu}^{\text{VO}_2})\text{CO}_3$  reported by Pidchenko *et al.* and exhibit similar behavior [62].

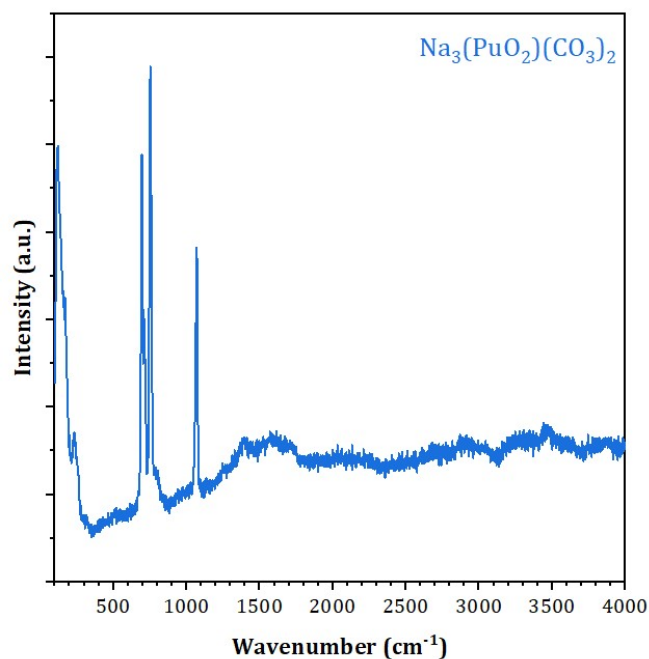

Figure S 3 : Raman spectrum of  $\text{Na}_3(\text{Pu}^{\text{V}}\text{O}_2)(\text{CO}_3)_2$  used as Pu(+V) reference

- Pu(VI):  $(\text{Pu}^{\text{VI}}\text{O}_2)(\text{CO}_3)_3^{4-}$

$(\text{Pu}^{\text{VI}}\text{O}_2)(\text{CO}_3)_3^{4-}$  in aqueous media was obtained by electrooxidation of a Pu(IV) stock solution in nitric media. This solution was then added dropwise to a  $2 \text{ mol}\cdot\text{L}^{-1}$  sodium carbonate solution, leading to the formation of Pu(VI) carbonate complexes. The solution was filtrated in order to avoid the presence of colloids. The obtention of the  $(\text{Pu}^{\text{VI}}\text{O}_2)(\text{CO}_3)_3^{4-}$  complex was checked by UV-vis spectroscopy (Figure S 3).

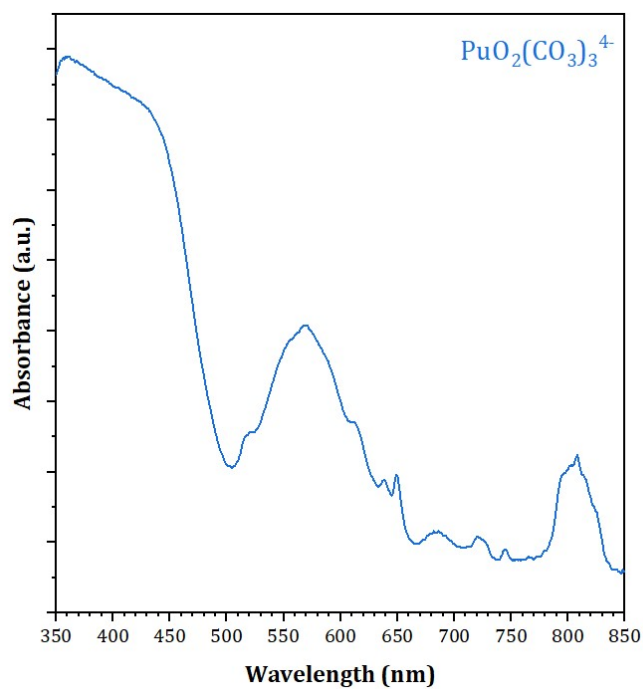

Figure S 4: UV-vis spectrum of  $(\text{Pu}^{\text{VI}}\text{O}_2)(\text{CO}_3)_3^{4-}$  complex used as Pu(+VI) reference

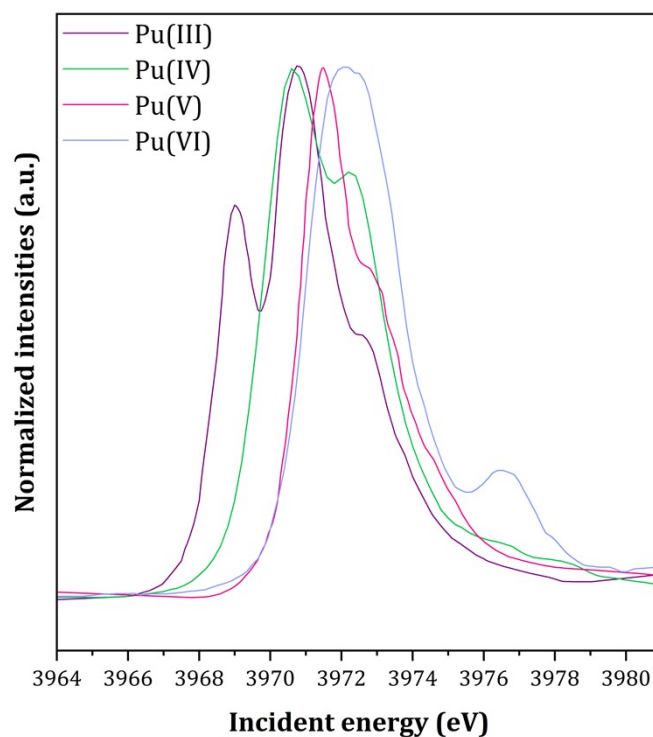

Figure S 5 : HERFD-XANES spectra of plutonium references recorded at plutonium  $M_4$  edge: Pu(+III) is  $\text{Pu}^{\text{III}}\text{PO}_4$ , Pu(+IV) is  $\text{PuO}_2$ , Pu (+V) is  $\text{Na}_5(\text{Pu}^{\text{V}}\text{O}_2)(\text{CO}_3)_3$  and Pu(+VI) is  $(\text{Pu}^{\text{VI}}\text{O}_2)(\text{CO}_3)_3^{4-}$

- **U M4 edge :**

- U(IV) :  $\text{UO}_2$

$\text{UO}_2$  was obtained by U(+VI) precipitation with hydrogen peroxide, the sample was then calcinated 6 hours at 1000°C under reductive atmosphere (Ar 95.7% ;  $\text{H}_2$  4,3%). The stoichiometry of the oxide (O/M = 2.00) was checked by PXRD measurement.

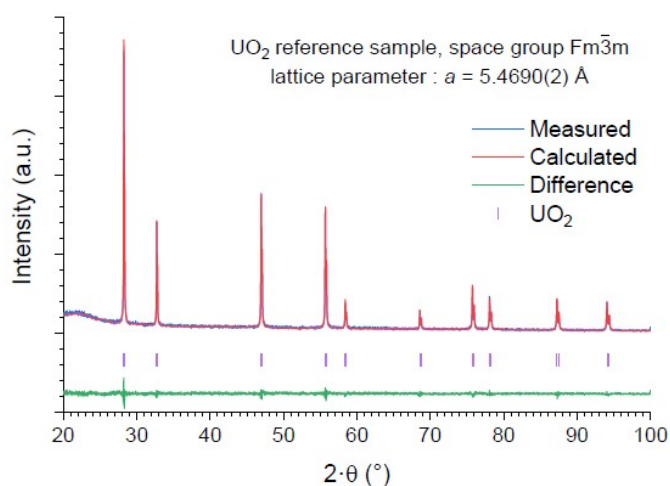

Figure S 6: PXRD-pattern of  $\text{UO}_2$  powder used for spectrometer alignment and U(+IV) reference

- U(+V)

$\text{KUO}_3$  spectra at uranium  $M_4$  edge was taken from Leinders *et al.* work in reference [63].

- U(+VI)

$\beta$ - $\text{UO}_3$  spectra at uranium  $M_4$  edge was taken from Leinders *et al.* work in reference [63].

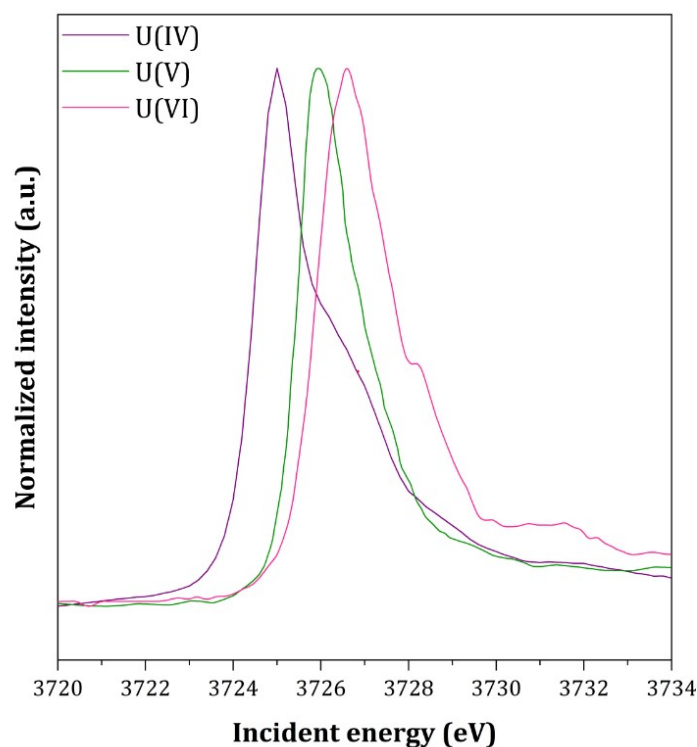

Figure S 7 : HERFD-XANES spectra of uranium references recorded at uranium  $M_4$  edge: U(+IV) is  $\text{UO}_2$ , U(+V) and U(+VI) are taken from [63]

## References

- [32] J. Monnier, "Conversion des nitrates d'actinides en oxydes par combustion en solution," Université de Montpellier, CEA Marcoule, 2019.
- [41] G. Peter Soldani, "Approche structurale et phénoménologique de la conversion directe ou modifiée de nitrate d'actinide(s) en oxyde," Université de Lille, 2013.
- [53] F. Deganello and A. K. Tyagi, "Solution combustion synthesis, energy and environment: Best parameters for better materials," *Prog. Cryst. Growth Charact. Mater.*, vol. 64, no. 2, Art. no. 2, Jun. 2018, doi: 10.1016/j.pcrysgrow.2018.03.001.
- [61] C. Madic, D. E. Hobart, and G. M. Begun, "Raman spectrometric studies of Actinide(V) and -(VI) complexes in aqueous sodium carbonate solution and of solid sodium Actinide(V) carbonate compounds," *Inorg. Chem.*, vol. 22, pp. 1494–1503, 1983.
- [62] I. Pidchenko, J. März, M. O. J. Y. Hunault, S. Bauters, S. M. Butorin, and K. O. Kvashnina, "Synthesis, Structural, and Electronic Properties of  $\text{K}_4\text{PuVIO}_2(\text{CO}_3)_3(\text{cr})$ : An Environmentally Relevant Plutonium Carbonate Complex," *Inorg. Chem.*, vol. 59, pp. 11889–11893, 2020.
- [63] G. Leinders, R. Bes, J. Pakarinen, K. Kvashnina, and M. Verwerft, "Evolution of the Uranium Chemical State in Mixed-Valence Oxides," *Inorg. Chem.*, vol. 56, Art. no. 12, Jun. 2017.
